# Supplementary material for: Pwp2 mediates UTP-B assembly via two structurally independent domains
Source: PubMed Central journal article supplement (PMC5466602; doi:10.1038/s41598-017-03034-y), 2017-06-09

## Supplementary information

### Title

## Pwp2 mediates UTP-B assembly via two structurally independent domains

Fanny Boissier <sup>1§</sup>, Christina Maria Schmidt <sup>2§</sup>, Jan Linnemann<sup>2</sup>, Sébastien Fribourg <sup>1\*</sup>; Jorge Perez-Fernandez <sup>2\*</sup>

<sup>1</sup> Université de Bordeaux, INSERM U1212, CNRS 5320, Bordeaux, France

<sup>2</sup> Universität Regensburg, Biochemie-Zentrum Regensburg (BZR), Lehrstuhl Biochemie III, D-93053 Regensburg, Germany

### SUPPLEMENTAL DATA

**Table S1: Oligonucleotides used in this study.** Oligonucleotides used for different purposes are described. Database numbers, sequence and usage are indicated. Oligonucleotides marked with “#” belong to the Department of Biochemistry III at the University of Regensburg. Oligonucleotides marked with “o” belong to the collection of the UTP-Lab.

| Col. N. | Name           | 5'-3'-sequence                                                          | Purpose                                                                               |
|---------|----------------|-------------------------------------------------------------------------|---------------------------------------------------------------------------------------|
| #1203   | RPA135-pYM-for | CTATCCGCAATGGGTATAAGATTG<br>CGTTATAATGTAGAGCCCAAACGT<br>ACGCTGCAGGTCGAC | Forward oligo for the mCherry tagging of Rpa135 using the plasmid pFA6a:1xmCHERRY-Hph |
| #1204   | RPA135-pYM-rev | CCTTCATTTACCATTCTATATCAATT<br>TGGAAAGAAGGGTATTTCTATCGA<br>TGAATTCGAGCTC | Reverse oligo for the mCherry tagging of Rpa135 using the plasmid pFA6a:1xmCHERRY-Hph |
| #3942   | Sall_Pwp2_5    | GTCGACGCGTTCAATCTGCGGTC<br>TGCTC                                        | Used to eliminate the PWP2 coding region and insert a Sall site instead.              |
| #3943   | PstI_Pwp2_3    | TGACTGCAGAAAATATTCAGTGTCC<br>TCTA                                       | Used to eliminate the PWP2 coding region and insert a PstI site instead.              |
| #3949   | 5'SLIC_PWP2    | GTCACGACGTTGTAAAACGACGGC<br>CAGTGAATTCGAGCTCGACTCCAA<br>GATGCGTAAGGC    | Cloning of PWP2 locus containing 5' and 3' regulatory sequences.                      |
| #3950   | 3'SLIC_PWP2    | TCACACAGGAAACAGCTATGACCA<br>TGATTACGCCAAGCTTTGATAGTAT<br>GAAACGGTAGTCG  | Cloning of PWP2 locus containing 5' and 3' regulatory sequences.                      |

| Col. N. | Name           | 5'-3'-sequence                                                         | Purpose                                                                                                                           |
|---------|----------------|------------------------------------------------------------------------|-----------------------------------------------------------------------------------------------------------------------------------|
| #3950   | 3'SLIC_PWP2    | TCACACAGGAAACAGCTATGACCA<br>TGATTACGCCAAGCTTTGATAGTAT<br>GAAACGGTAGTCG | 5'UTR_PWP23'UTR cloning                                                                                                           |
| #3951   | Sall_PWP2Fo    | GTAGACAGGAGAGCAGACCGCAG<br>ATTGAACCGCGTCGACATGAAATC<br>CG              | Cloning of PWP2 ORF containing a Sall site for subcloning                                                                         |
| #3952   | PstI_Pwp2Re    | TGATGTGAATGTGCATAAATAGAG<br>GACAGTGAAGTGCAGTCAAGGAA<br>GCTC            | Cloning of PWP2 ORF containing a PstI site for subcloning                                                                         |
| #3953   | PstI_Pwp2_corr | TGACTGCAGTTCCTGTCCTCT                                                  | Fow primer to clone truncations                                                                                                   |
| #3162   | PWP2_Xmal_fw   | TTGTTGCCCGGGATGAAATCCGAT<br>TTCAAGTTCTCT                               | forward primer for sequencing of mutated pwp2 on pJPF19 and pCJPF39                                                               |
| #3185   | PWP2_seq_fw2   | GAGGCCATCCGATGACGA                                                     | forward primer for sequencing of mutated pwp2 on pJPF19 and pCJPF39                                                               |
| #3186   | PWP2_seq_rev2  | CCCATCAGTTGATACCAAAAATCT                                               | reverse primer for sequencing of mutated pwp2 on pJPF19 and pCJPF39                                                               |
| #3187   | PWP2_seq_rev3  | TATCAATACGATCCTCCAAATCTGA                                              | reverse primer for sequencing of mutated pwp2 on pJPF19 and pCJPF39                                                               |
| #3999   | Pwp2_103C_SLIC | GTGCATAAATAGAGGACAGTGAAC<br>TGCAGTCA_AGCCGTCGAGAAGAG<br>ATATTTG        | Cloning of DC103 truncation together with #3951                                                                                   |
| #4000   | Pwp2_206C_SLIC | GTGCATAAATAGAGGACAGTGAAC<br>TGCAGTCA_CAGATCAAAGGGATC<br>AAATAATATC     | Cloning of DC206 truncation cloning together with #3951                                                                           |
| #4001   | Pwp2_309C_SLIC | GTGCATAAATAGAGGACAGTGAAC<br>TGCAGTCA_TCTTTTAACAAGACT<br>TCATTTGG       | Cloning of DC309 truncation cloning together with #3951                                                                           |
| o1      | Utp21_S3       | GTGAAGTTTTGCATGGGAGTGGCA<br>GCTTTTGTGACCACCGCG_CGTAC<br>GCTGCAGGTCGAC  | TAP tagging of Utp21 using the pYM collection                                                                                     |
| o2      | Utp21_S2       | CAATCTGCCTTTGTTACTAATATAC<br>TTGTTCTATATAATGC_ATCGATGA<br>ATTCGAGCTCG  | TAP tagging o Utp21 using the pYM collection                                                                                      |
| o13     | PWP2_61XD_re   | TTCTTCTAACAAGACTTCATTTGG                                               | reverse primer used to introduce mutations into PWP2; as a result Lys at position 613 and Arg at position 614 are replaced by Asp |
| o14     | PWP2_61XD_fo   | CCAAATGAAGTCTTGTAGAAGAA<br>TTCATTGTGTCCAGAAACATGG                      | forward primer used to introduce mutations into PWP2; as a result Lys at position 613 and Arg at position 614 are replaced by Asp |
| o16     | PWP1_32C       | CTCGTCGTCAGATTCATGAC                                                   | Cloning of DC32 truncation cloning together with #3953                                                                            |
| o17     | PWP2_66C       | TTCCATGGACCCATCAGTTG                                                   | Cloning of DC66 truncation cloning together with #3953                                                                            |
| o26     | R140-fo2       | CTTCGTCGCCATGACGTACATGC<br>GGGACACTTTCAAGAC                            | forward primer used to introduce mutations into PWP2; as a result Arg at position 140 is replaced by Asp                          |

| Col. N. | Name           | 5'-3'-sequence                                                               | Purpose                                                                                                                                                                                                      |
|---------|----------------|------------------------------------------------------------------------------|--------------------------------------------------------------------------------------------------------------------------------------------------------------------------------------------------------------|
| o27     | R140-re2       | GTGTCCCGCATGTACGTCATGGCG<br>GACGAAGGGAGCAAAC                                 | reverse primer used to introduce mutations into <i>PWP2</i> ; as a result Arg at position 140 is replaced by Asp                                                                                             |
| o32     | Utp21_2302fo   | GGGGATGAAGCCTCTGTCTAGAG                                                      | Mobilization of C-terminal tagging coding sequences at <i>UTP21</i> locus                                                                                                                                    |
| o33     | Utp21_3302re   | GGATTCGGAGATCCCTATCCAC                                                       | Mobilization of C-terminal tagging coding sequences at <i>UTP21</i> locus                                                                                                                                    |
| o45     | Mut_129-30E_Fo | CAGATTTGGAAGACTCCAGATGTT<br>AACAAACGCAGACAGTTTGCTCCC<br>TTCGTCCG             | forward primer used to introduce mutations into <i>PWP2</i> together with o47; as a result Asp at position 130 is replaced by Lys.                                                                           |
| o46     | Mut_130K_Fo    | CAGATTTGGAAGACTCCAGATGTT<br>AACAAACGCAGACAGTTTGCTCCC<br>TTCGTCCG             | reverse primer used to introduce mutations into <i>PWP2</i> together with o47; as a result Arg at position 129 and Lys at position 131 are replaced by Glu as well as Asp at position 130 is replaced by Lys |
| o47     | Mutloop1_Re    | GTTAACATCTGGAGTCTTCCAAATC<br>TG                                              |                                                                                                                                                                                                              |
| o48     | MtR505E_Fo     | CGCATATGGTCCATATTTGGTGAA_<br>AGCCAACAAGTAGAACCTATAGAA<br>GTTTATTCCG          | forward primer used to introduce mutations into <i>PWP2</i> ; as a result Arg at position 505 is replaced by Glu                                                                                             |
| o49     | MtR505E_re     | TACTTGTTGGCTTTACCAAATATG<br>GACCATATGCGAATTGTTTTATCCC<br>ATGATGC             | reverse primer used to introduce mutations into <i>PWP2</i> ; as a result Arg at position 505 is replaced by Glu                                                                                             |
| o50     | FLAG_pwp2A692  | ATGGATTACAAGGATGACGACGAT<br>AAGGGTACCGGATCCGCATTGCC<br>GCTGCTTCAAC           | Forward primer used together with #3950 to amplify the coding region of last 232 aa of <i>PWP2</i>                                                                                                           |
| o51     | FLAG_pwp2G807  | ATGGATTACAAGGATGACGACGAT<br>AAGGGTACCGGATCC_GGTGGTTA<br>CATAAATGAACACAAATATC | Forward primer used together with #3950 to amplify the coding region of last 117 aa of <i>PWP2</i>                                                                                                           |
| o82     | Pwp2_F4        | GGTAGACAGGAGAGCAGACCGCA<br>GATTGAACCGCATCCCA_GAATTC<br>GAGCTCGTTTAAAC        | forward primer for insertion of KANMX::GAL::HA cassette in the <i>PWP2</i> locus                                                                                                                             |
| o84     | Pwp2_R3        | GCCTGTAGACCGTACCTAAAAGGT<br>TAGAGAACTGAAATCGGATTTCA<br>TGCACTGAGCAGCGTAATCTG | reverse primer for insertion of KANMX::GAL::HA cassette in the <i>PWP2</i> locus                                                                                                                             |
| #205    | o2-18S         | CATGGCTTAATCTTTGAGAC                                                         | Hybridize in the rDNA, 18S                                                                                                                                                                                   |
| #207    | o4-A2/A3       | TGTTACCTCTGGGCC                                                              | Hybridize in the rDNA, ITS1                                                                                                                                                                                  |
| #2921   | A0A1-Sonde     | CCCACCTATTCCCTCTTGCTAG                                                       | Hybridize in the rDNA, 5'-ETS                                                                                                                                                                                |
| #3468   | U3-SnR17A      | CCGCTAAGGATTGCGGACCAAGC                                                      | Hybridize in the U3 snoRNA                                                                                                                                                                                   |
| #3570   | SnR128-U14     | TCACTCAGACATCCTAGGAAGG                                                       | Hybridize in the U14 snoRNA                                                                                                                                                                                  |
| #3839   | ITS1 D-A2 mid  | AAGCCTAGCAAGACCGCGCA                                                         | Hybridize in the rDNA, ITS1                                                                                                                                                                                  |

**Table S2: Plasmids used in this study.** Database numbers, name of the plasmid, contained markers for selection and the cloning procedure are indicated. Plasmids marked with “#” belong to the Department

of Biochemistry III at the University of Regensburg. Plasmids marked with “*p*” belong to the collection of the UTP-Lab.

| #     | Name        | Gene                   | Marker       | Origin          | Cloning procedure                                                                              |
|-------|-------------|------------------------|--------------|-----------------|------------------------------------------------------------------------------------------------|
| #1    | pBS         | Empty backbone         | Amp          | Biochemie III   |                                                                                                |
| #49   | YCplac33    | empty backbone plasmid | Amp/<br>URA3 | Biochemie III   | <sup>1</sup>                                                                                   |
| #1225 | pYM44       | One-step PCR           | Amp          | Biochemie III   | <sup>2</sup>                                                                                   |
| #1837 | pCM182-LEU2 | Empty backbone plasmid | Amp/<br>URA3 | Biochemie III   | <i>LEU2</i> marker replaces <i>TRP1</i> in pCM182 <sup>3,4</sup>                               |
| p107  | pJPF19      | <i>PWP2</i>            | Amp          | This study      | <i>PWP2</i> locus including 5' and 3' regulatory regions cloned in pBluescriptKS (+/-).        |
| p108  | pCMS1       | <i>pwp2-R129/K131E</i> | Amp          | This study      | PCR product obtained with oligonucleotides o45-o47 cloned in pJPF19 using the SLIC protocol    |
| p109  | pCMS2       | <i>pwp2-D130K</i>      | Amp          | This study      | PCR product obtained with oligonucleotides o46-o47 cloned in pJPF19 using the SLIC protocol    |
| p110  | pCMS3       | <i>pwp2-E473Δnsi1</i>  | Amp          | This study      | Subcloning from XX in pJPF19 using BamHI and NsiI sites.                                       |
| p111  | pCMS4       | <i>pwp2-R505E</i>      | Amp          | This study      | PCR product obtained with oligonucleotides o48-o49 cloned in pJPF19 using the SLIC protocol    |
| p120  | pCMS13      | <i>pwp2-ΔC32</i>       | Amp          | This study      | PCR product obtained with oligonucleotides o16-#3953 cloned in pJPF19 using blunt end ligation |
| p121  | pCMS14      | <i>pwp2-ΔC66</i>       | Amp          | This study      | PCR product obtained with oligonucleotides o17-#3953 cloned in pJPF19 using blunt end ligation |
| p122  | pCMS15      | <i>pwp2-ΔC103</i>      | Amp          | This study      | PCR product obtained with oligonucleotides #3999-3951 cloned in pJPF19 using the SLIC protocol |
| p123  | pCJPF39     | <i>PWP2</i>            | Amp/<br>URA3 | Pérez-Fernández | [SacI-HinDIII]-fragment from pJPF19 subcloned in YCplac33                                      |
| p124  | pCCMS1      | <i>pwp2-R129/K131E</i> | Amp/<br>URA3 | This study      | [Sall-PstI]-fragment from pCMS1 subcloned in pCJPF39                                           |
| p125  | pCCMS2      | <i>pwp2-D130K</i>      | Amp/<br>URA3 | This study      | [Sall-PstI]-fragment from pCMS2 subcloned in pCJPF39                                           |
| p126  | pCCMS3      | <i>pwp2-E473Δnsi1</i>  | Amp/<br>URA3 | This study      | [BamHI-PstI]-fragment from pCMS3 subcloned in pCJPF39                                          |

| #           | Name                    | Gene                    | Marker       | Origin     | Cloning procedure                                                                              |
|-------------|-------------------------|-------------------------|--------------|------------|------------------------------------------------------------------------------------------------|
| <b>p127</b> | pCCMS4                  | <i>pwp2-R505E</i>       | Amp/<br>URA3 | This study | [BamHI-PstI]-fragment from pCMS4 subcloned in pCJPF39                                          |
| <b>p128</b> | pCCMS5                  | <i>pwp2-K613/R614E</i>  | Amp/<br>URA3 | This study | [BamHI-PstI]-fragment from pCMS5 subcloned in pCJPF39                                          |
| <b>p136</b> | pCCMS13                 | <i>pwp2-ΔC32</i>        | Amp/<br>URA3 | This study | [BamHI-PstI]-fragment from pCMS13 subcloned in pCJPF39                                         |
| <b>p137</b> | pCCMS14                 | <i>pwp2-ΔC66</i>        | Amp/<br>URA3 | This study | [BamHI-PstI]-fragment from pCMS14 subcloned in pCJPF39                                         |
| <b>p138</b> | pCCMS15                 | <i>pwp2-ΔC103</i>       | Amp/<br>URA3 | This study | [BamHI-PstI]-fragment from pCMS15 subcloned in pCJPF39                                         |
| <b>p168</b> | pJPF20                  | <i>pwp2-E335R</i>       | Amp          | This study | Subcloning from XX in pJPF19 using AflII and MscI sites.                                       |
| <b>p169</b> | pJPF21                  | <i>pwp2-K368E</i>       | Amp          | This study | Subcloning from XX in pJPF19 using AflII and BamHI sites.                                      |
| <b>p170</b> | pJPF22                  | <i>pwp2-R418E/R420E</i> | Amp          | This study | Subcloning from XX in pJPF19 using AflII and BamHI sites.                                      |
| <b>p171</b> | pJPF23                  | <i>pwp2-E473R</i>       | Amp          | This study | Subcloning from XX in pJPF19 using BamHI and NsiI sites.                                       |
| <b>p172</b> | pCJPF40                 | <i>pwp2-E335R</i>       | Amp/<br>URA3 | This study | [BamHI-PstI]-fragment from pJPF20 subcloned in pCJPF39                                         |
| <b>p173</b> | pCJPF41                 | <i>pwp2-K368E</i>       | Amp/<br>URA3 | This study | [BamHI-PstI]-fragment from pJPF21 subcloned in pCJPF39                                         |
| <b>p174</b> | pCJPF42                 | <i>pwp2-R418E/R420E</i> | Amp/<br>URA3 | This study | [BamHI-PstI]-fragment from pJPF22 subcloned in pCJPF39                                         |
| <b>p175</b> | pCJPF43                 | <i>pwp2-E473R</i>       | Amp/<br>URA3 | This study | [BamHI-PstI]-fragment from pJPF23 subcloned in pCJPF39                                         |
| <b>p176</b> | pCMS16                  | <i>pwp2-ΔC206</i>       | Amp          | This study | PCR product obtained with oligonucleotides #4000-3951 cloned in pJPF19 using the SLIC protocol |
| <b>p177</b> | pCMS17                  | <i>pwp2-ΔC309</i>       | Amp          | This study | PCR product obtained with oligonucleotides #4001-3951 cloned in pJPF19 using the SLIC protocol |
| <b>p178</b> | pCCMS16                 | <i>pwp2-ΔC206</i>       | Amp/<br>URA3 | This study | [BamHI-PstI]-fragment from pCMS16 subcloned in pCJPF39                                         |
| <b>p179</b> | pCCMS17                 | <i>pwp2-ΔC309</i>       | Amp/<br>URA3 | This study | [BamHI-PstI]-fragment from pCMS17 subcloned in pCJPF39                                         |
| <b>p180</b> | pCCMS24                 | <i>pwp2-G807-P923</i>   | Amp/<br>URA3 | This study | PCR product from o51-#3950 cloned in pCM182-LEU2-FLAG at BamHI-HindIII using the SLIC protocol |
| <b>p181</b> | pFA6a-kanMX6-PGAL1::3HA | One-step PCR            | Amp          | This Study | <sup>5</sup>                                                                                   |

| #    | Name                                   | Gene         | Marker | Origin     | Cloning procedure                                                                                                                    |
|------|----------------------------------------|--------------|--------|------------|--------------------------------------------------------------------------------------------------------------------------------------|
| p182 | pFA6a::1xmCHERRY:Hph                   | One-step PCR | Amp    | This Study | <sup>2</sup> Plasmid obtained by religation of <i>AleI</i> digested plasmid pFA6-mCHERRY-Hph (kindly provided by Brigitte Pertschy). |
|      | pET-His-Pwp2(1-716)                    | One-step PCR | Amp    | This Study | PCR product was cloned by LIC strategy in a modified pET-15b <sup>6</sup>                                                            |
|      | pET-His-Pwp2(717-923)                  | One-step PCR | Amp    | This Study | PCR product was cloned by LIC strategy in a modified pET-15b <sup>6</sup>                                                            |
|      | pEt-Utp12p-Utp13p                      | One-step PCR | Kan    | This Study | PCR product was cloned by LIC strategy in a modified pET-28b <sup>6</sup>                                                            |
|      | pCDF-Utp21(699-939)                    | One-step PCR | Sm     | This Study | PCR product was cloned by LIC strategy in a modified pCDF <sup>6</sup>                                                               |
|      | pET-Utp21p                             | One-step PCR | Sm     | This Study | PCR product was cloned by LIC strategy in a modified pCDF <sup>6</sup>                                                               |
|      | pET-His-Utp12p                         | One-step PCR | Amp    | This Study | PCR product was cloned by LIC strategy in a modified pET-15b <sup>6</sup>                                                            |
|      | pET-Utp13p                             | One-step PCR | Kan    | This Study | PCR product was cloned by LIC strategy in a modified pET-28b <sup>6</sup>                                                            |
|      | pET-Utp13p(649-817)                    | One-step PCR | Kan    | This Study | PCR product was cloned by LIC strategy in a modified pET-28b <sup>6</sup>                                                            |
|      | pET-His-Utp13p(1-648)                  | One-step PCR | Amp    | This Study | PCR product was cloned by LIC strategy in a modified pET-15b <sup>6</sup>                                                            |
|      | pET-Utp12p(1-687)                      | One-step PCR | Kan    | This Study | PCR product was cloned by LIC strategy in a modified pET-28b <sup>6</sup>                                                            |
|      | pET-HisUtp12p(1-687)                   | One-step PCR | Amp    | This Study | PCR product was cloned by LIC strategy in a modified pET-15b <sup>6</sup>                                                            |
|      | pET-His-Utp12p(687-943)                | One-step PCR | Amp    | This Study | PCR product was cloned by LIC strategy in a modified pET-15b <sup>6</sup>                                                            |
|      | pET-His-Utp12p(688-943)-Utp13(649-817) | One-step PCR | Amp    | This Study | PCR product was cloned by LIC strategy in a modified pET-15b <sup>6</sup>                                                            |
|      | pET-Kan-Pwp2p(717-943)-Utp21(699-939)  | One-step PCR | Kan    | This Study | PCR product was cloned by LIC strategy in a modified pET-15b <sup>6</sup>                                                            |

**Table S3: Yeast strains used in this study.** Database numbers, name of the plasmid, contained markers for selection and the cloning procedure are indicated. Yeast strains marked with “#” belong to the Department of Biochemistry III at the University of Regensburg. Plasmids marked with “Y” belong to the collection of the UTP-Lab.

| #     | Name             | Genotype                                                                                                     | Origin        |
|-------|------------------|--------------------------------------------------------------------------------------------------------------|---------------|
| #206  | BY4741           | MATa; <i>his3-1; leu2-0; met15-0; ura3-0</i>                                                                 | Biochemie III |
| #2506 | BY4741 UTP21-TAP | MATa; <i>his3-1; leu2-0; met15-0; ura3-0; YLR409C-TAP::HIS3MX6</i>                                           | Biochemie III |
| Y287  | YMJH1-1a         | MATa; <i>his3-1; leu2-0; met15-0; ura3-0; KANMX::GAL::HA-PWP2</i>                                            | This study    |
| Y289  | YCMS3-1a         | MATa; <i>his3-1; leu2-0; met15-0; ura3-0; KANMX::GAL::HA-PWP2; YLR409C-TAP::HIS3MX6</i>                      | This Study    |
| Y339  | YCMS4-1a         | MATa; <i>his3-1; leu2-0; met15-0; ura3-0; KANMX::GAL::HA-PWP2; YLR409C-GFP::HIS3MX6</i>                      | This Study    |
| Y344  | YCMS5-1a         | MATa; <i>his3-1; leu2-0; met15-0; ura3-0; KANMX::GAL::HA-PWP2; YLR409C-GFP::HIS3MX6; RPA135-mCHERRY::Hph</i> | This Study    |

## Figure Legend

### **Figure S1: General SSU-processome proteins.**

As indicated in figure 1, Utp21-TAP-purified proteins were identified and quantitated by Mass Spectrometry. Isobaric labelling of peptides (iTRAQ, see Materials and Methods) was used to compare the protein levels in wild-type Utp21 and in Pwp2 deleted strains. The bar graphs represent the ratios for the indicated purifications represented in logarithmic scale. The average of ratios for proteins identified in three experiments with at least two peptides is shown for SSU-processome factors that do not fit in the categories shown in figure 1D, 1E and 1F.

### **Figure S2: Sequence conservation and electrostatic surface potential of Pwp2p tandem repeat.**

Pwp2p tandem repeat structure is displayed in **A)** under the same orientation as Figure 1A. The residue conservation has been calculated using the sequence alignment displayed in Figure S1 and using the CONSURF server interface <sup>7</sup>(Panel A, C, E, G). Only residues conserved above 80 % are displayed in a gradient from orange (80 % conservation) to purple (identical). Panels B, D, F, and H display the

electrostatics surface potential as calculated from PyMol using APBS plugin<sup>8</sup> (blue = positively charged, red = negatively charged). Panels C-D; E-F, and G-H were generated from the orientation A-B by iterative rotations of 90° in the x-axis as indicated. Some conserved residues are indicated, mutated residues used in this study are shown in bold.

**Figure S3: Sequence alignments of Pwp2 orthologues.**

Sequences were aligned using ClustalX (6) and displayed using Jalview (7). Disordered regions of Pwp2 are boxed. Numbering on top of the sequences refers to the yeast Pwp2 while numbering beneath the alignment is an absolute count. The secondary structures indicated above the sequences are deduced from the crystal structure of Pwp2p (this work) and inferred from the crystal structure of *C.t* Utp1<sup>9,\*</sup> indicates the amino acids substituted by site directed mutagenesis. Other relevant sequences for this work are also indicated.

**Figure S4: Growth assays and expression analysis of different *pwp2* mutants.**

**A-B)** Drop assays of Pwp2 mutant strains. The yCMS3 strain was transformed with the backbone plasmid YCplac33 (“empty”), the wild-type *PWP2* containing plasmid pJPF39 (“*PWP2*”) or a plasmid containing a mutation in *PWP2*. Serial dilutions of cells were plated either on SCG medium allowing for the expression of a genomic copy of an HA-tagged copy of *PWP2*, or in the SCD medium where only the Pwp2 copy encoded in the plasmid is expressed. Incubation temperature is indicated at the right side. **C)** Expression analysis of Pwp2 mutants. 5 ODs of cell cultures expressing the different Pwp2p mutants were obtained and proteins were obtained by TCA extraction. Samples were resolved in 8% SDS-PAGE for western blot analysis with antibodies against GFP, Pwp2p and Utp18p. **D)** Doubling time of different *pwp2* mutants at 30° and 37°C. Expression of the genomic copy of *PWP2* (*gPWP2* “ON”) allows a similar doubling time for all strains regardless of the *PWP2* allele co-expressed at both temperatures. In contrast, *pwp2-ΔC66* mutant show a mild growth defect at both temperatures in absence of the endogenous Pwp2p (*gPWP2* “OFF”) and *pwp2-K613E/R614E* mutant shows a mild growth defect only at 37°C.



**Figure S5: Relevance of the CTD domain of Pwp2 for cell growth and trans-complementation analysis between tWD and CTD domains of Pwp2.**

**A)** Drop assay of Pwp2 mutant strains. The yCMS3 strain was transformed with the backbone plasmid YCplac33 (“empty”), the wild-type *PWP2* containing plasmid pJPF39 (“*PWP2*”) or a plasmid containing a mutation in *PWP2*. Serial dilutions of cells were plated either on SCG medium allowing for the expression of a genomic copy of an HA-tagged copy of *PWP2*, or in the SCD medium where only the Pwp2 copy encoded in the plasmid is expressed. Incubation temperature is indicated at the right side.

**B)** Doubling time of the Pwp2p tWD/CTD $\Delta$ 66 mutant shows a stronger growth defect at 20 °C when compared to a strain expressing the wt Pwp2p. **C)** Trans-complementation assay. The yCMS3 strain was co-transformed with two different plasmids. On one hand, the backbone plasmid YCplac33 (“empty”), the plasmid containing the wild-type *PWP2* (“*PWP2*”) or a plasmid containing one of the *Pwp2p* truncated forms (*pwp2- $\Delta$ C103*, *pwp2- $\Delta$ C206*). On the other hand, a plasmid containing the coding region of the C-terminal fragments of Pwp2 complementary to the Pwp2p- $\Delta$ C206 or Pwp2p- $\Delta$ C103, CTD<sub>232</sub> or CTD117 respectively (see Fig. 3A). Expression of the CTD of Pwp2p is repressed in presence of Doxycyclin (1mg/ml). All clones grew similar on SCG medium allowing for the “overexpression” of a genomic copy of an HA-tagged copy of *PWP2* (*gPWP2* “ON”) and lacking Doxycyclin (CTD “ON”). In contrast, the expression of the two complementary coding regions of Pwp2p correlates with a reduction in the doubling time (compare CTD “ON” and “OFF” in absence of endogenous Pwp2p).

**Figure S6: UTP-B subunits overexpression in bacteria.**

**A)** Schematic representation of Utp21p, Utp12p, and Utp13p domain organization. Interactions observed in Figure 3E and 3F are summarized. **B-D)** In order to ensure that proteins were expressed in bacteria an assay was set-up in which the total bacterial cell content is analysed before and after induction by IPTG and revealed on SDS-PAGE and Coomassie-Blue staining. Overexpressed proteins are identified with an arrow.

**Figure S7: Utp12p(688-943)-Utp13p(648-817) complex purification.**

The minimal core domain necessary for Utp12p and Utp13p interaction was expressed and purified to

homogeneity. The size exclusion chromatography column profile and the corresponding SDS-PAGE analysis are shown. Additionally, a SDS-PAGE analysis displays the complex prior and after TEV cleavage.

**Figure S8: Localization of Utp21p and expression level of the Utp21p-GFP.**

The strain yCMS4-1a (containing *GAL::HA-PWP2* and *UTP21-GFP* at the endogenous *loci*) was transformed with plasmids containing the Pwp2p wild type allele or alleles encoding the truncated forms of Pwp2p (*pwp2-ΔC32*, *pwp2-ΔC66* or *pwp2-ΔC103*). Exponentially growing cells were shifted from galactose to glucose containing medium and further cultured for 14 h (Wt, *pwp2-ΔC32* and *pwp2-ΔC66*) or 10 h (*pwp2-ΔC103*) keeping exponential growth conditions. In both cases cells were harvested and processed for fluorescent microscopy analysis as indicated in the Material and Methods. From left to right: DAPI staining (blue), Utp21p:GFP (green) and merged images. The scale bar represents 4 μm.

- 1 Gietz, R. D. & Sugino, A. New yeast-Escherichia coli shuttle vectors constructed with in vitro mutagenized yeast genes lacking six-base pair restriction sites. *Gene* **74**, 527-534 (1988).
- 2 Janke, C. *et al.* A versatile toolbox for PCR-based tagging of yeast genes: new fluorescent proteins, more markers and promoter substitution cassettes. *Yeast* **21**, 947-962, doi:10.1002/yea.1142 (2004).
- 3 Belli, G., Gari, E., Piedrafita, L., Aldea, M. & Herrero, E. An activator/repressor dual system allows tight tetracycline-regulated gene expression in budding yeast. *Nucleic Acids Res* **26**, 942-947 (1998).
- 4 Gari, E., Piedrafita, L., Aldea, M. & Herrero, E. A set of vectors with a tetracycline-regulatable promoter system for modulated gene expression in *Saccharomyces cerevisiae*. *Yeast* **13**, 837-848, doi:10.1002/(SICI)1097-0061(199707)13:9<837::AID-YEA145>3.0.CO;2-T (1997).
- 5 Longtine, M. S. *et al.* Additional modules for versatile and economical PCR-based gene deletion and modification in *Saccharomyces cerevisiae*. *Yeast* **14**, 953-961, doi:10.1002/(SICI)1097-0061(199807)14:10<953::AID-YEA293>3.0.CO;2-U (1998).
- 6 Diebold, M. L., Fribourg, S., Koch, M., Metzger, T. & Romier, C. Deciphering correct strategies for multiprotein complex assembly by co-expression: application to complexes as large as the histone octamer. *J Struct Biol* **175**, 178-188, doi:10.1016/j.jsb.2011.02.001 (2011).
- 7 Ashkenazy, H., Erez, E., Martz, E., Pupko, T. & Ben-Tal, N. ConSurf 2010: calculating evolutionary conservation in sequence and structure of proteins and nucleic acids. *Nucleic Acids Res* **38**, W529-533, doi:10.1093/nar/gkq399 (2010).
- 8 Baker, N. A., Sept, D., Joseph, S., Holst, M. J. & McCammon, J. A. Electrostatics of nanosystems: application to microtubules and the ribosome. *Proc Natl Acad Sci U S A* **98**, 10037-10041, doi:10.1073/pnas.181342398 (2001).
- 9 Zhang, C. *et al.* Integrative structural analysis of the UTPB complex, an early assembly factor for eukaryotic small ribosomal subunits. *Nucleic Acids Res* **44**, 7475-7486, doi:10.1093/nar/gkw562 (2016).

iTRAQ ratio

### SSU processome

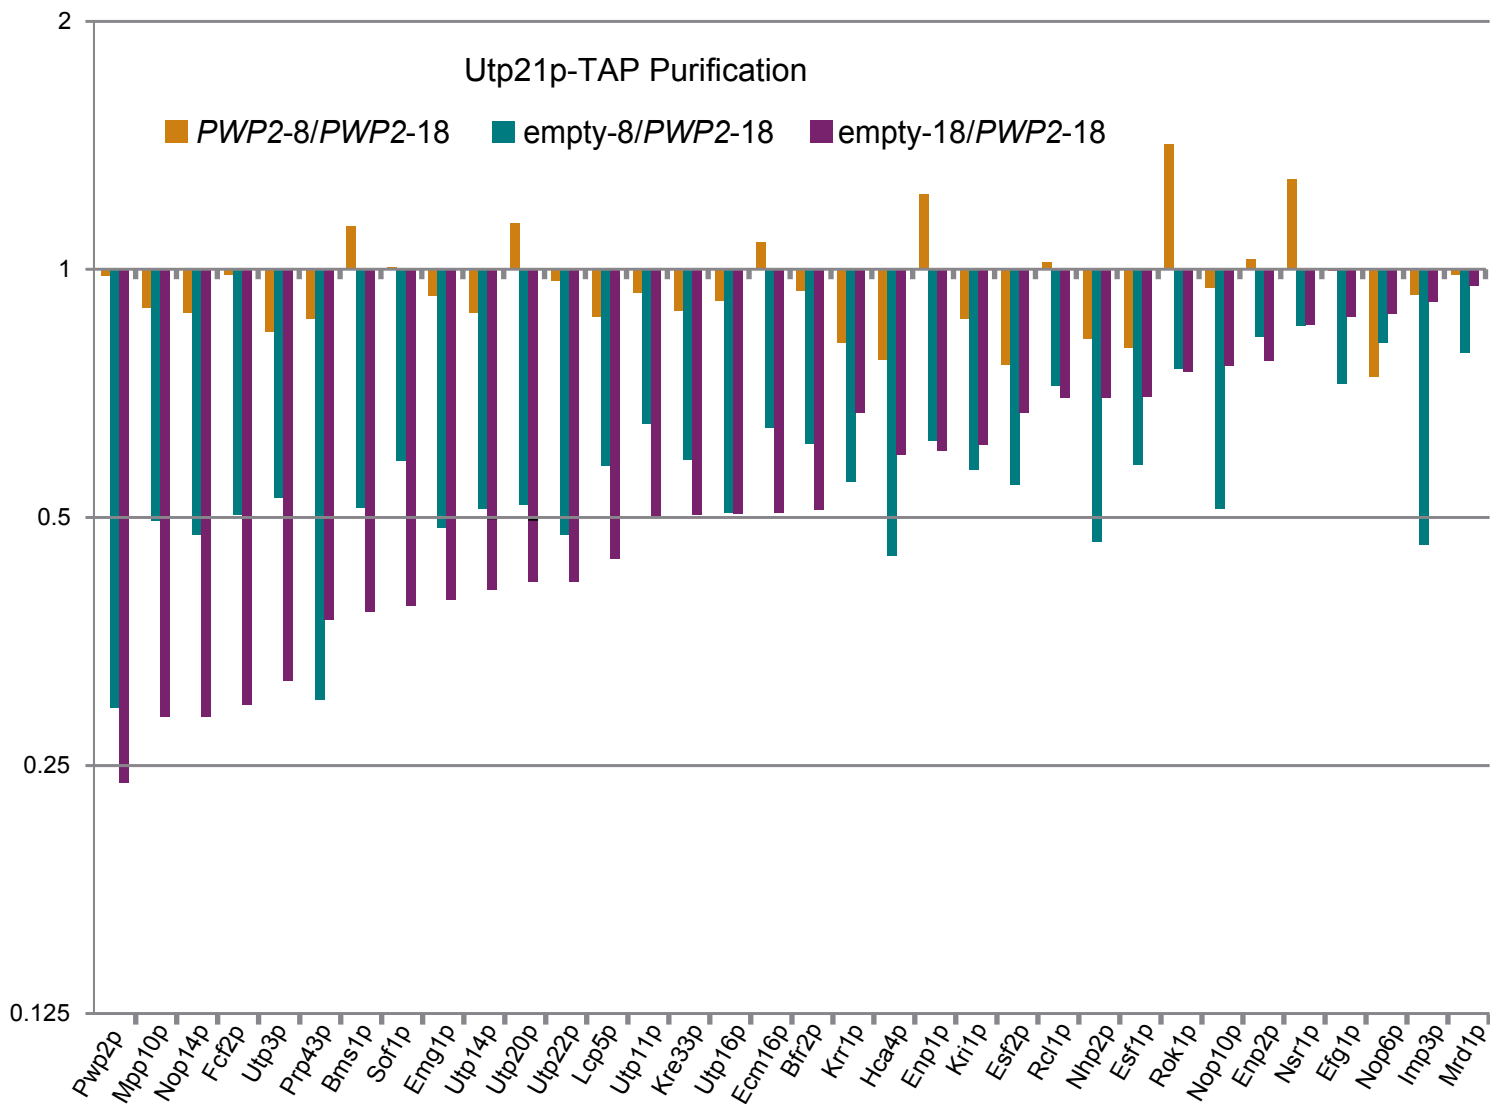

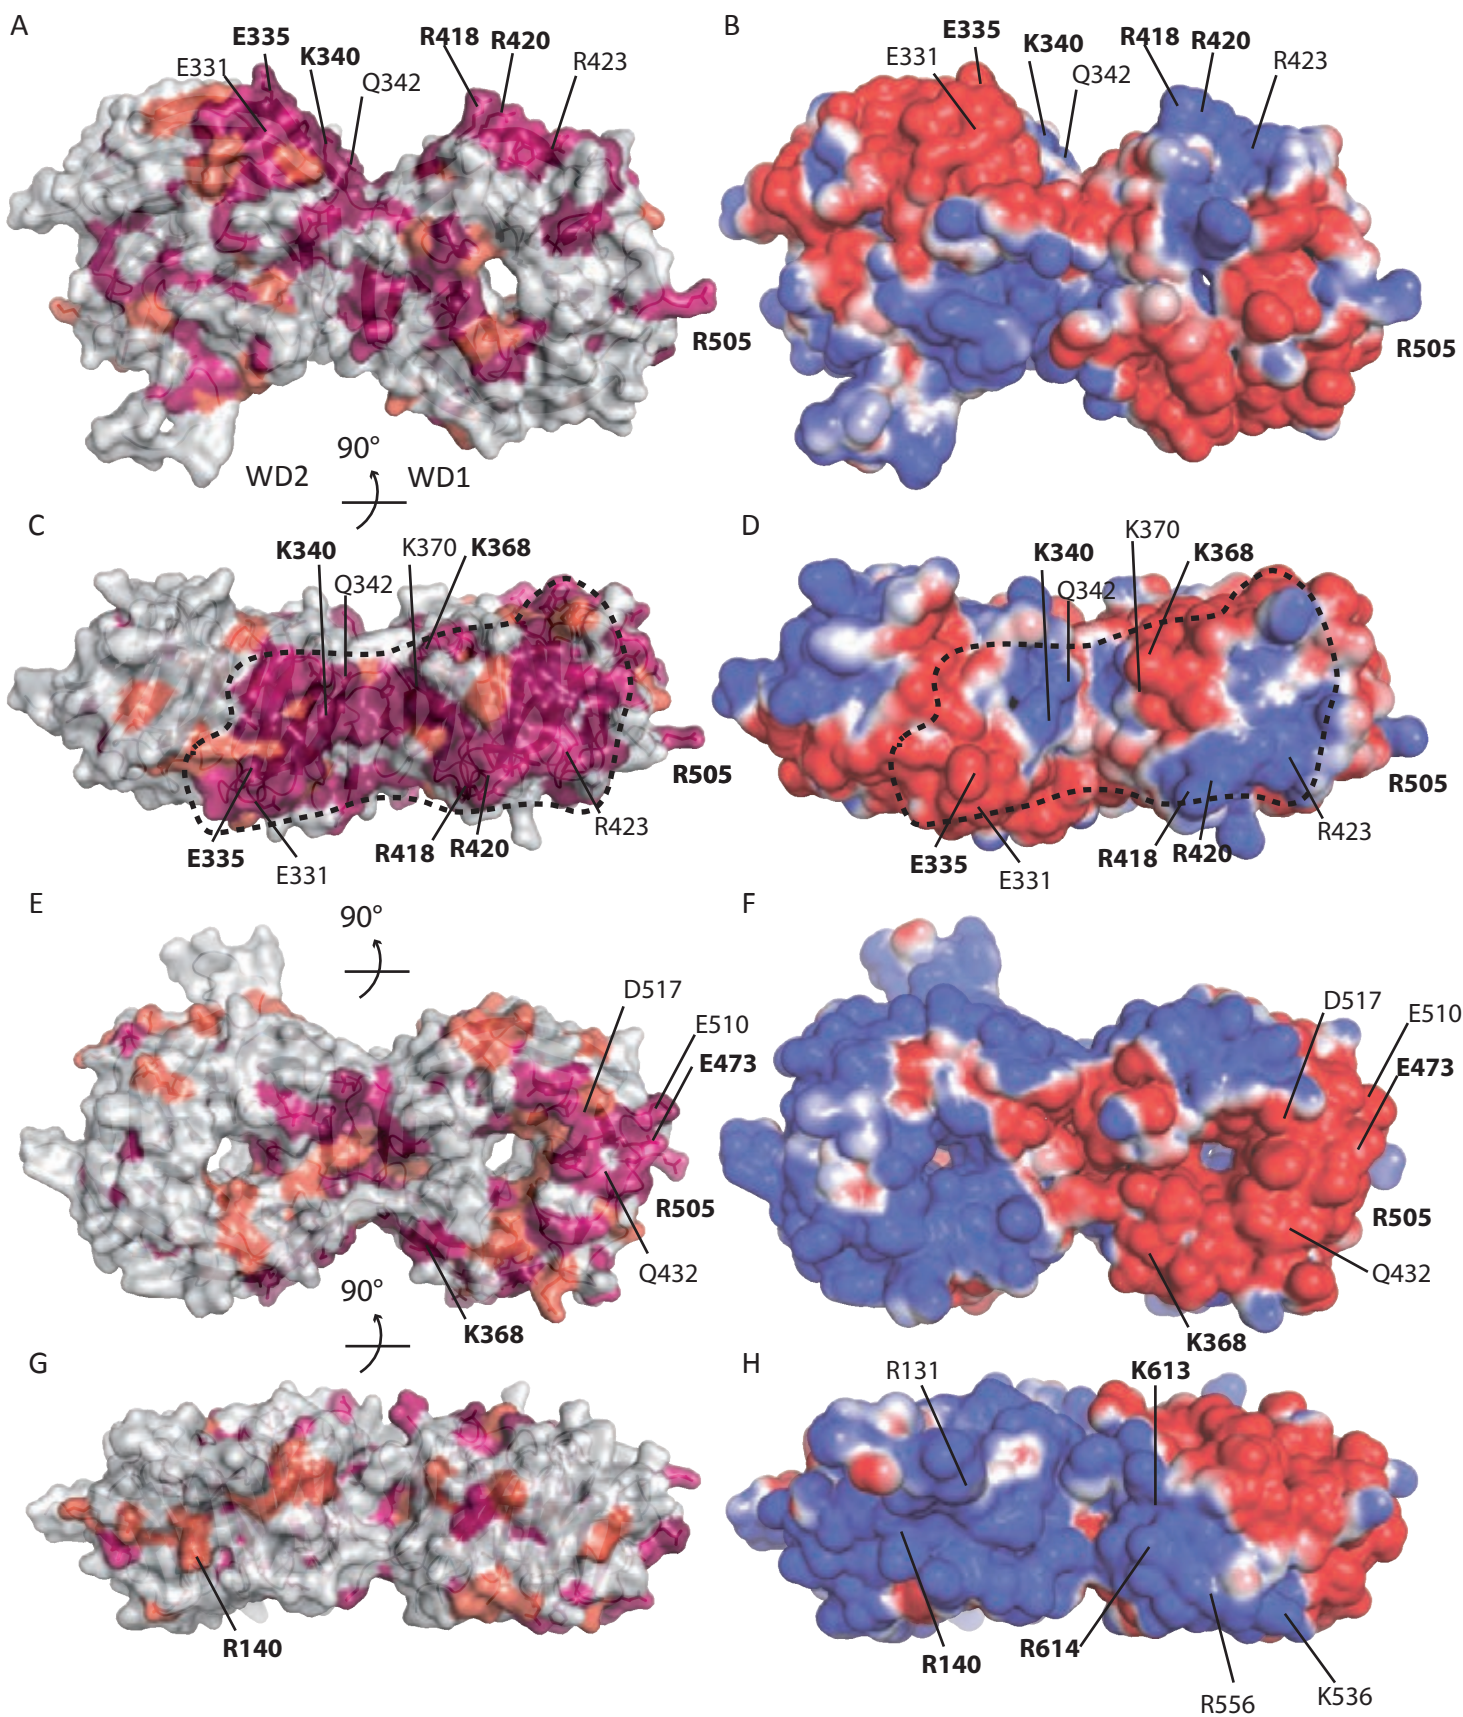

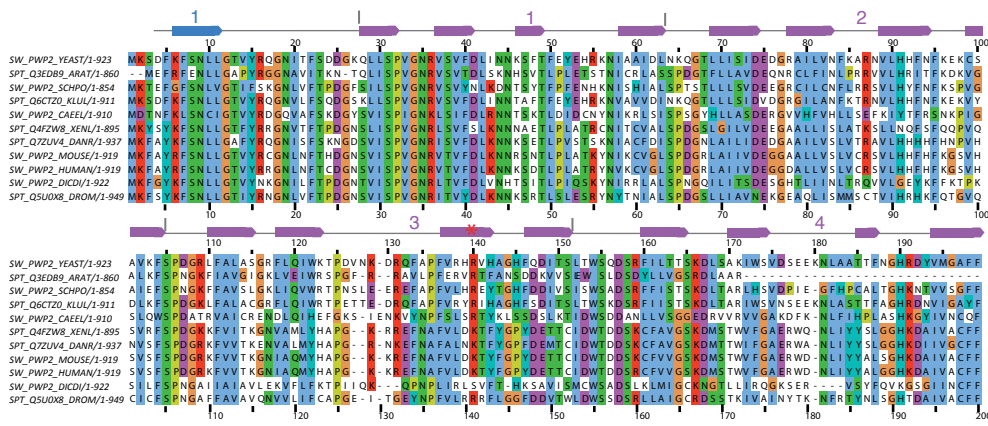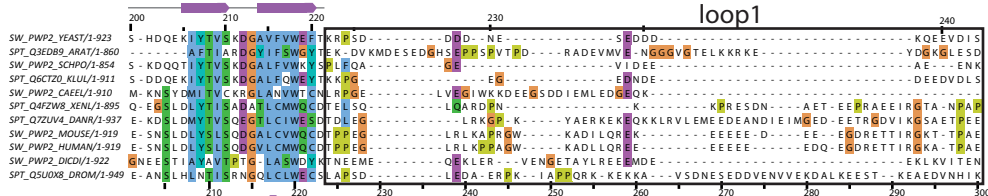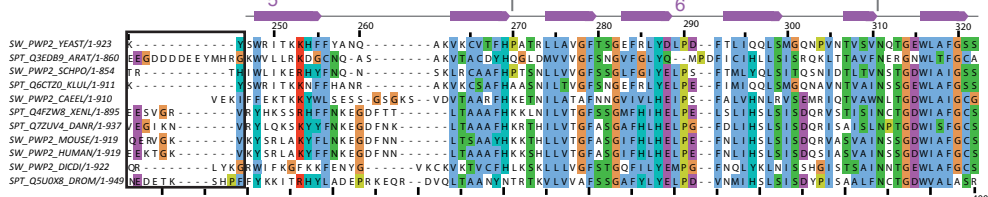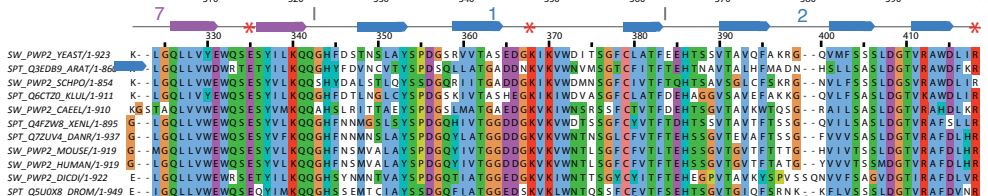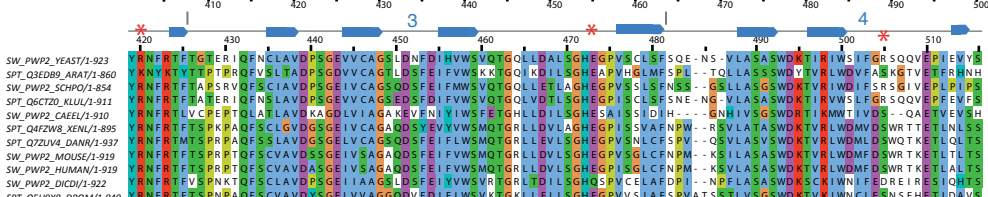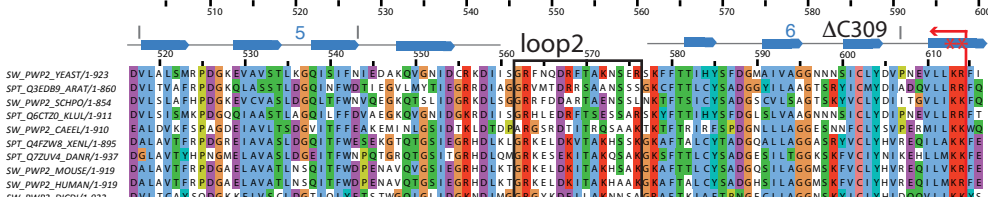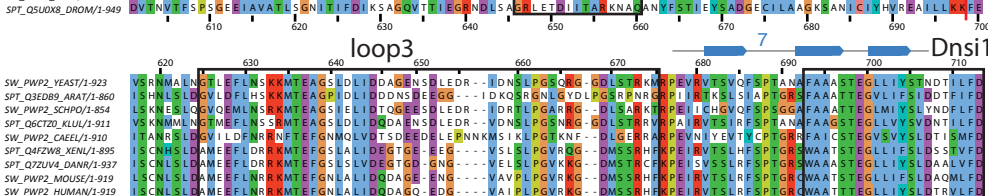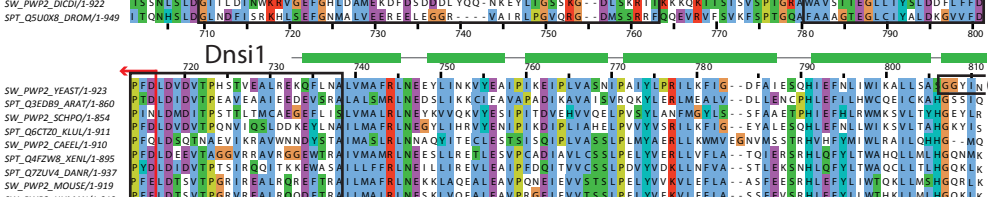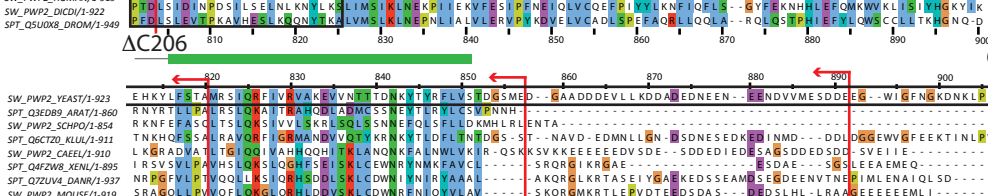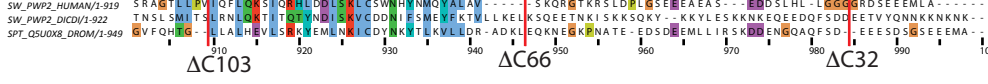



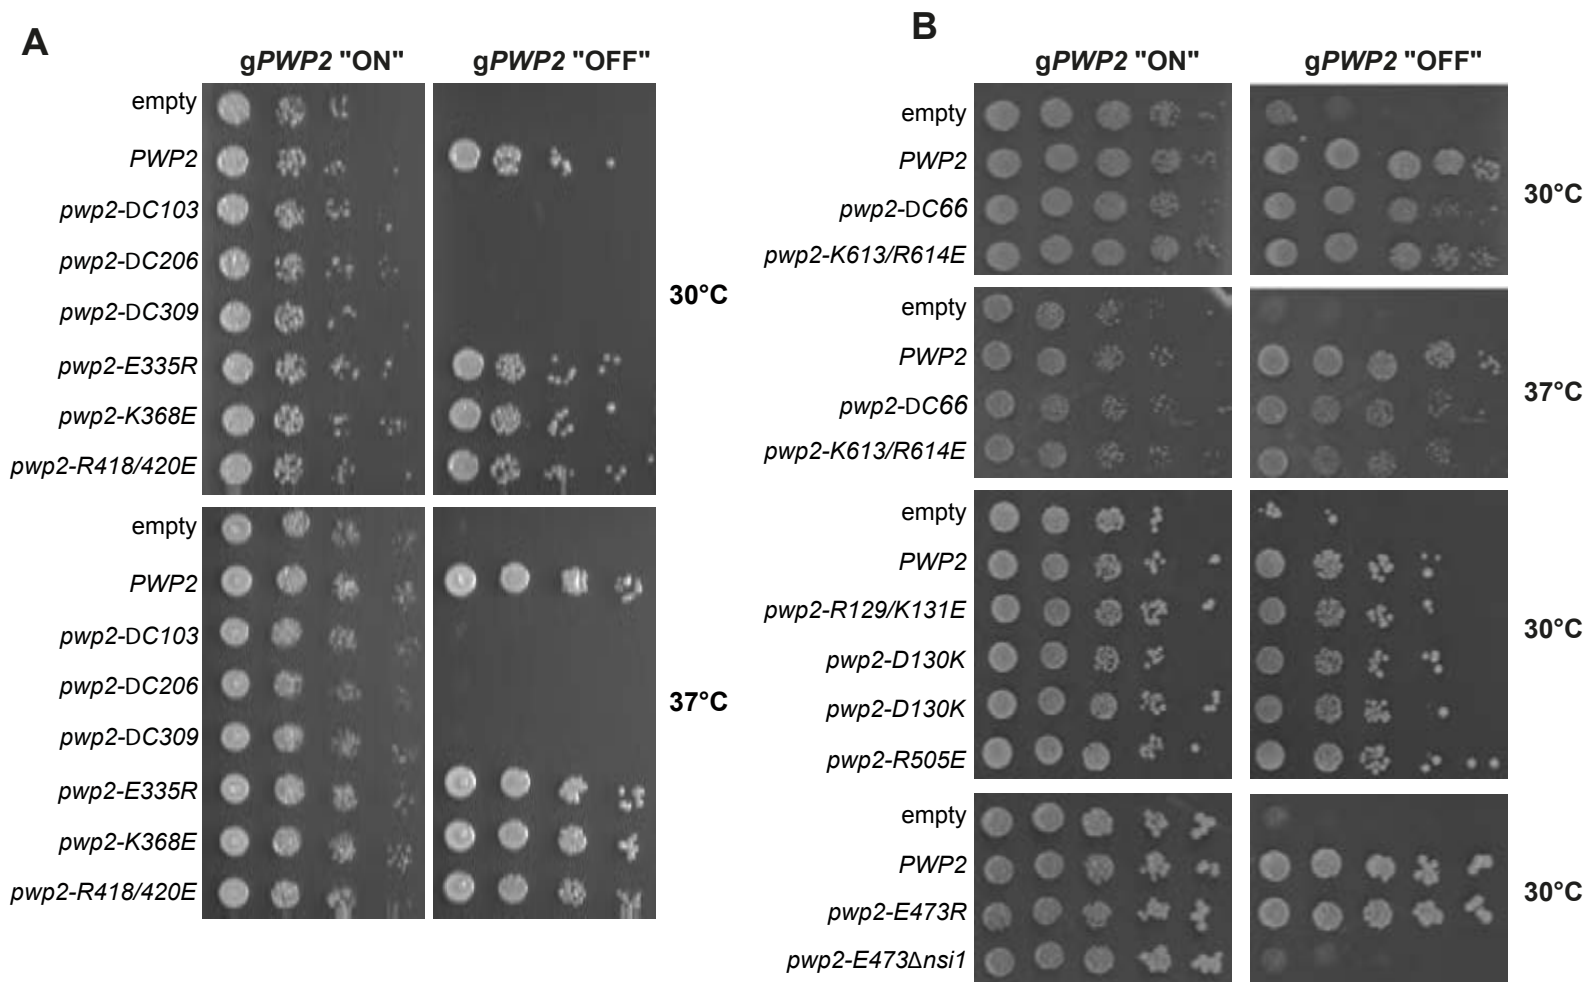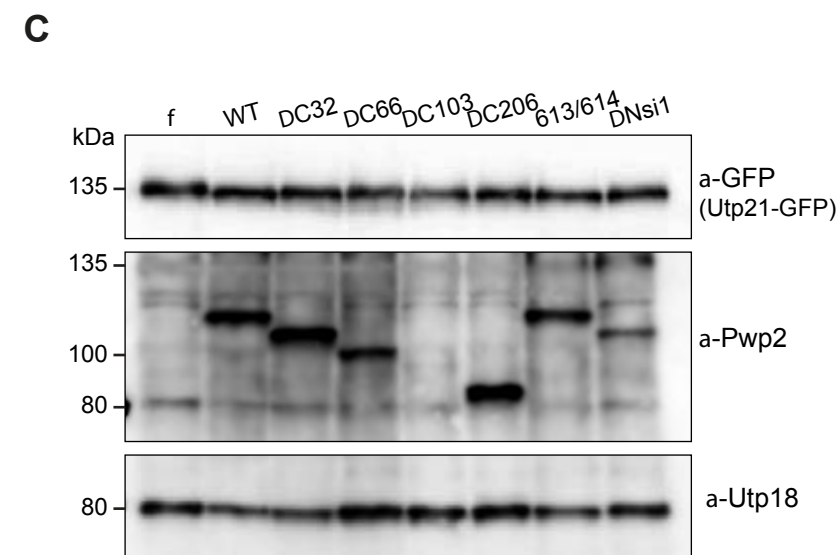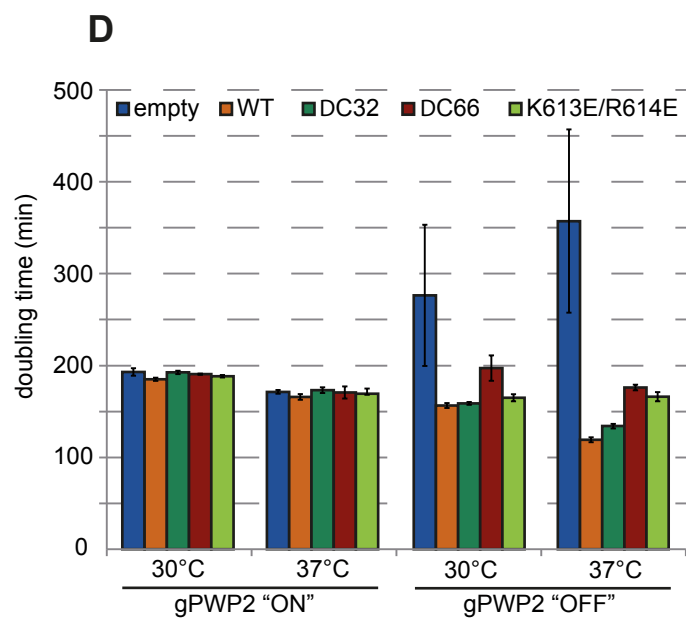

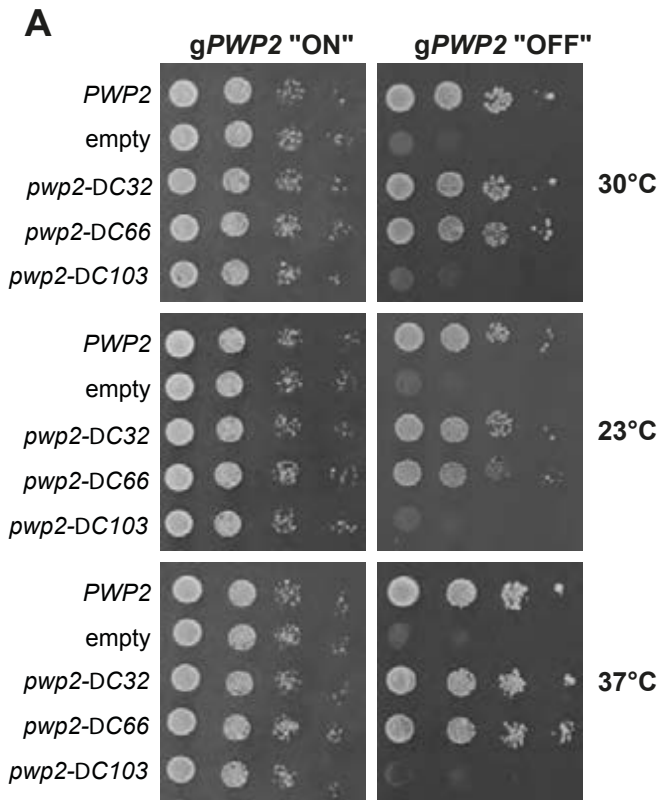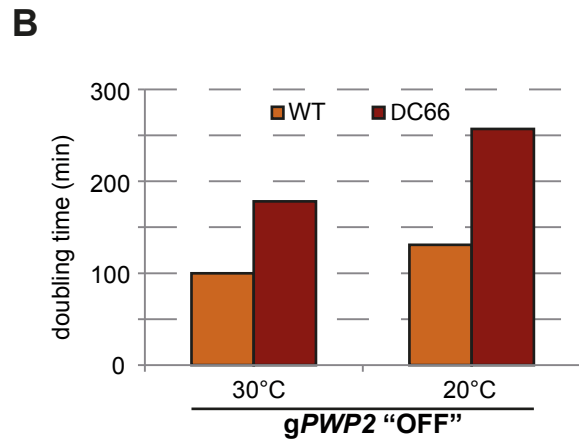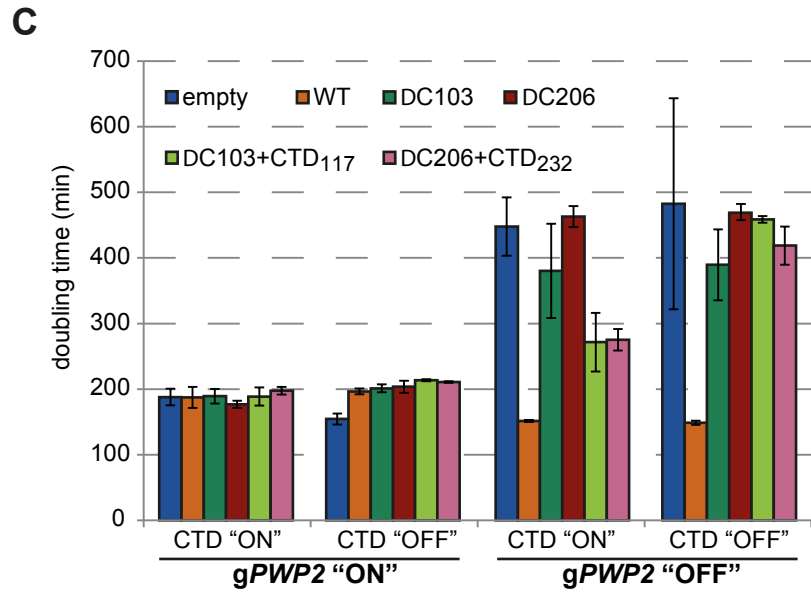

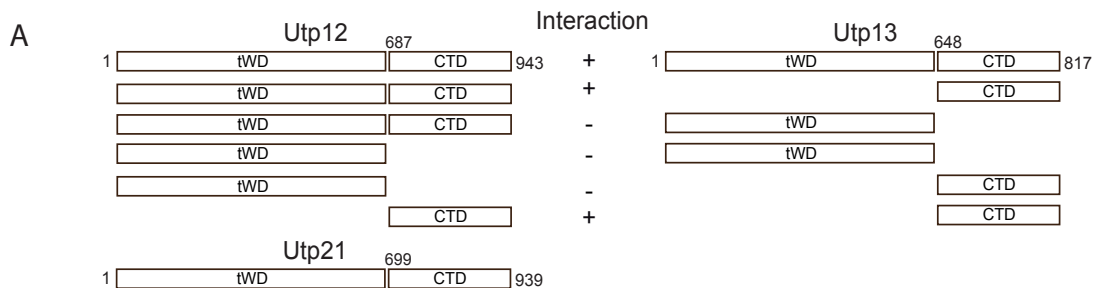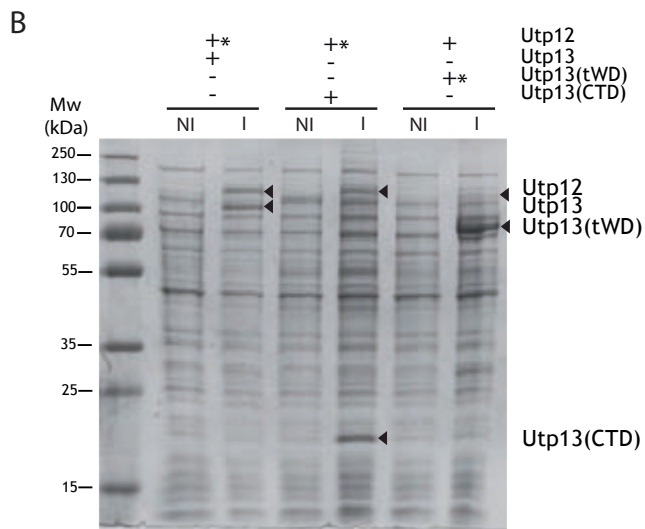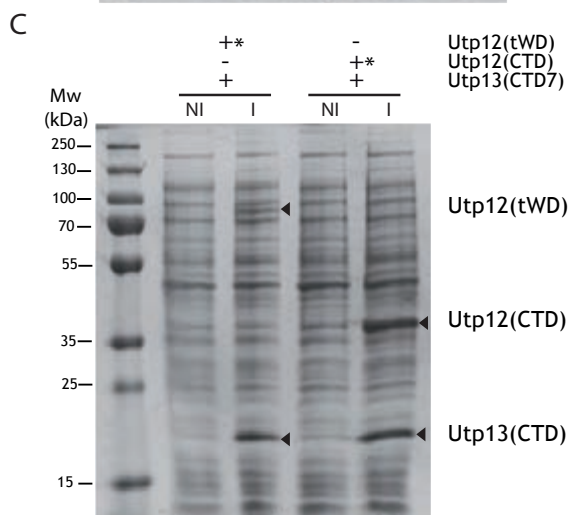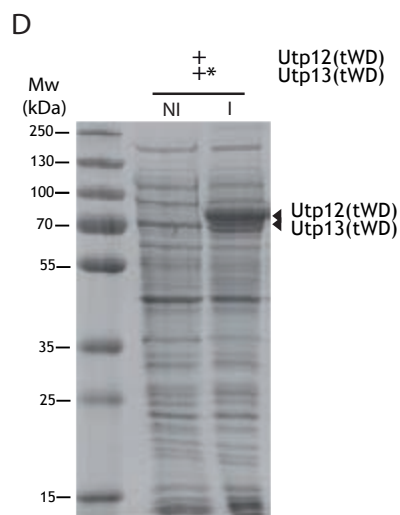



# Size exclusion chromatography of Utp12(CTD) and Utp13(CTD)

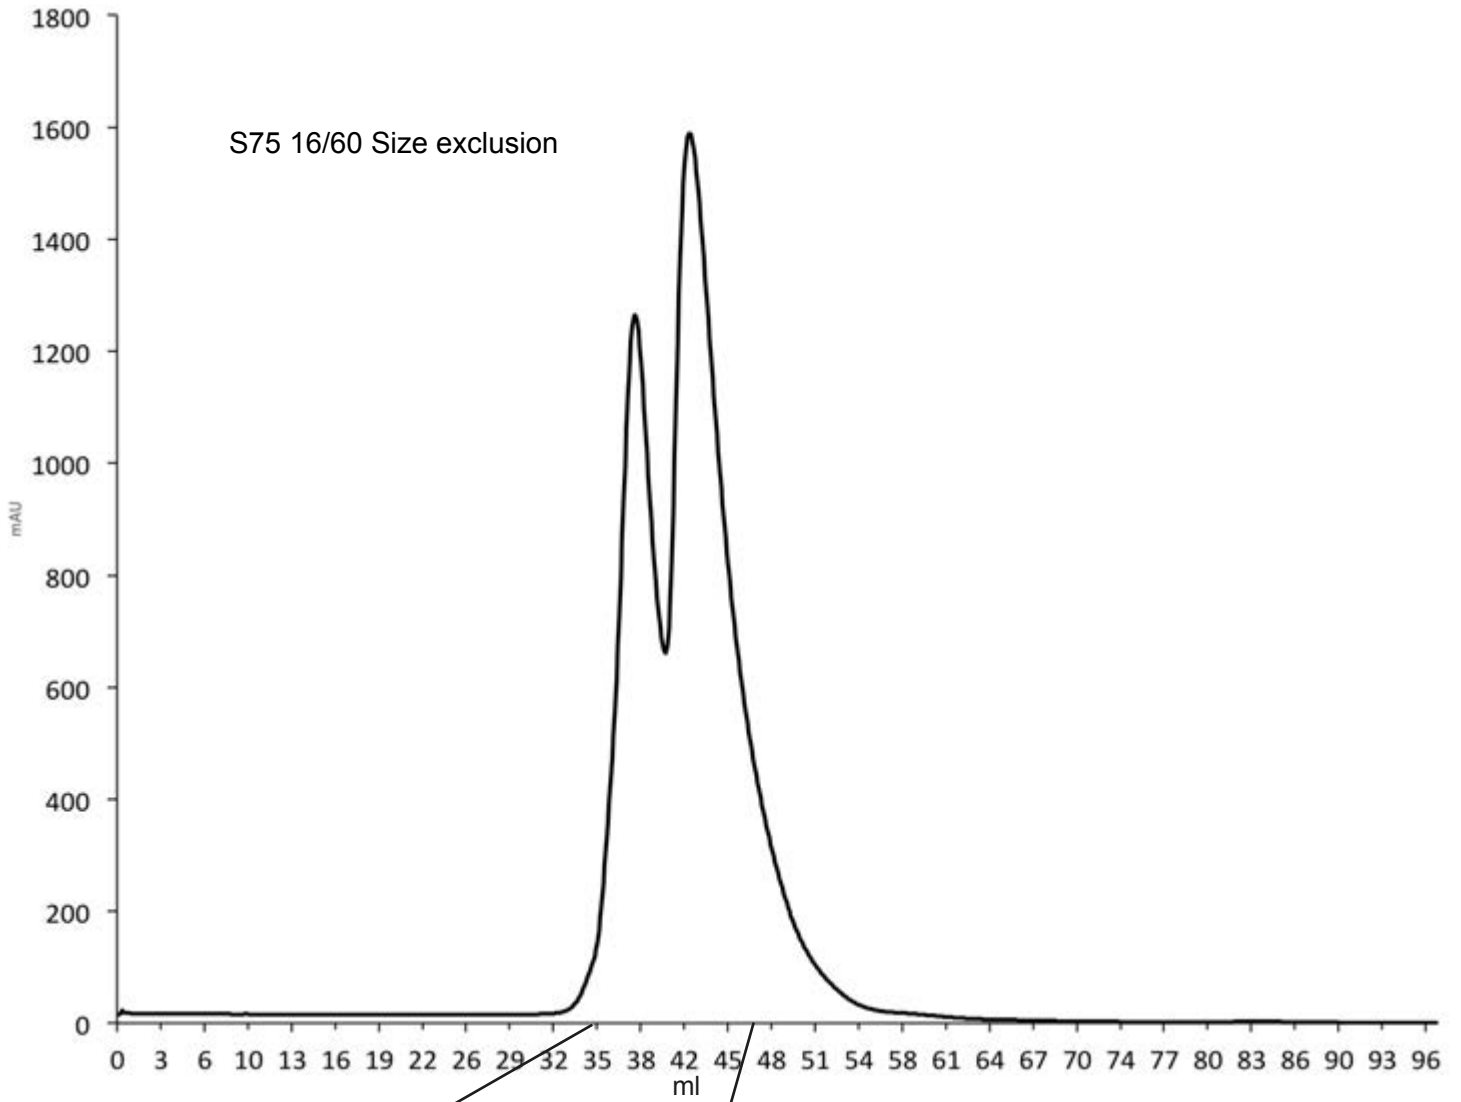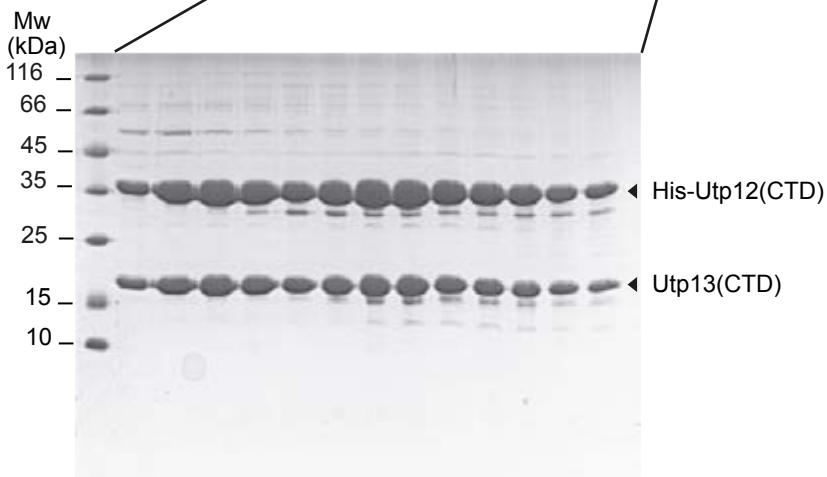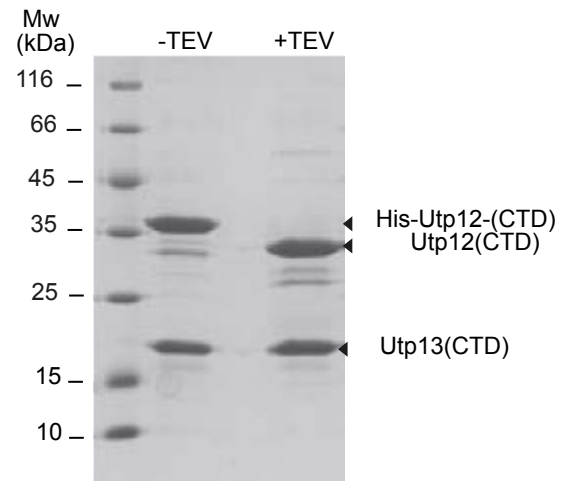

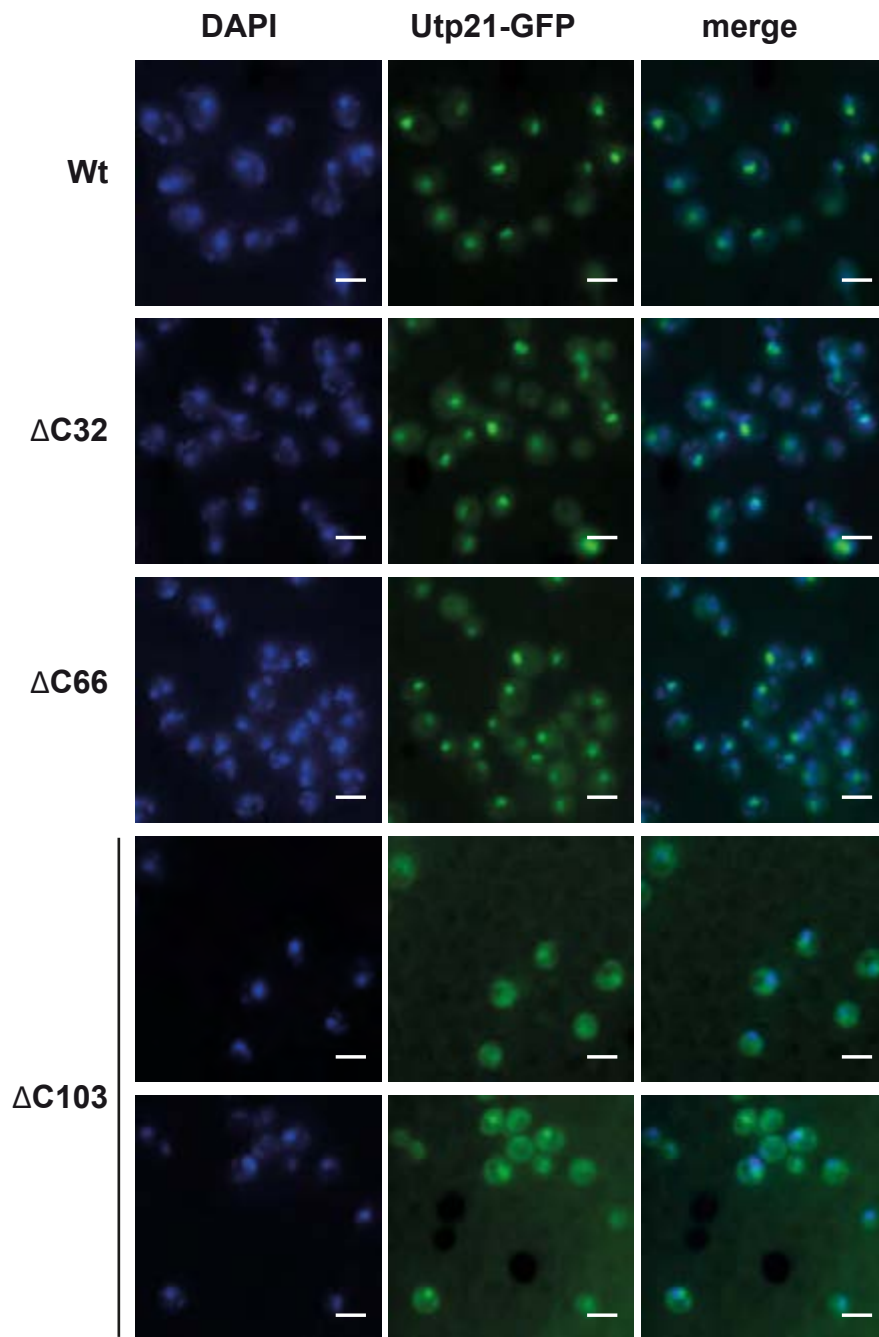

Supplement: 41598_2017_3034_MOESM1_ESM.pdf [file 41598_2017_3034_MOESM1_ESM.pdf]
